# Supplementary material for: The Rice Semi-Dwarf Mutant sd37, Caused by a Mutation in CYP96B4, Plays an Important Role in the Fine-Tuning of Plant Growth
Source: PLoS One. 2014 Feb 3;9(2):e88068. doi: 10.1371/journal.pone.0088068 (PMC3912173; doi:10.1371/journal.pone.0088068)
Supplement: Table S1 — Up- and down-regulated genes in the sd37 mutant, as determined by microarray analysis. Two-week-old sd37 and wild-type seedlings were selected. These biological replicates were generated and evaluated, and 317 differentially expressed genes (1.5-fold cutoff, P<0.05) were detected. (XLS) [file pone.0088068.s004.xls]

## Sheet: Table S1
Table S1. Genes up and down-regulated in the sd37 mutant by microarray analysis. Two-week-old seedlings of sd37 and wild-type rice plants were selected and three biological replicates were generated and evaluated, and 317 differentially expressed genes (1.5-fold cutoff, p-values < 0.05) were detected.
Sequence ID	*Fold change(sd37/3037)	P-value	Probe Set ID	Description and functional categories
LOC_Os05g03600.1	-23.8	0.00223079	Os.52896.1.S1_at	retrotransposon protein, putative, unclassified, expressed]:
AK101657	-20.7742	0.00292663	Os.53569.1.S2_at	---
NM_001058973	-16.7083	0.00726287	OsAffx.26130.1.S1_at	---
NM_001071283	-15.2188	0.00533022	Os.21894.1.S1_at	---
LOC_Os08g34390.1	-14.3161	0.00734975	Os.56875.1.S1_at	retrotransposon protein
NM_001053889	-13.8028	0.0072813	Os.49663.1.S1_at	---
AK069629	-13.5393	0.00307975	Os.24821.1.S1_at	---
LOC_Os09g07590.1	-12.7813	0.00644444	OsAffx.17593.1.S1_at	RGH1A
LOC_Os02g24400.1	-12.7736	0.00026449	OsAffx.12170.1.S1_at	---
LOC_Os02g53220.1	-12.3333	0.00414712	OsAffx.3053.1.S1_at	---
AK121354	-12.32	0.00853813	Os.9098.1.S1_at	---
LOC_Os07g41820.1	-11.4742	0.00606521	Os.11984.1.S2_at	stress responsive A/B Barrel domain containing protein, expressed
LOC_Os01g48110.1	-9.25	0.00189787	OsAffx.23705.1.S1_at	---
LOC_Os04g32260.1	-8.95652	0.00710597	OsAffx.14084.5.S1_x_at	---
AK110233	-8.92857	0.00500753	Os.56637.1.S1_at	---
LOC_Os12g42160.1	-8.40299	0.00147173	OsAffx.20085.1.S1_x_at	ATP binding protein, putative, expressed
AF308692	-8.1236	0.00763874	Os.50636.1.S1_s_at	---
LOC_Os03g30420.1	-8.04167	0.000719601	OsAffx.13127.1.S1_at	cytochrome P450
NM_001049990	-7.75421	0.0140338	Os.57295.1.S1_at	---
LOC_Os02g50590.1	-7.63265	0.00160621	OsAffx.24814.1.S1_at	---
NM_001070489	-7.37795	0.0242127	Os.16898.2.S1_at	---
AK110401	-7.16379	0.0064688	Os.56774.1.S1_at	---
LOC_Os04g43200.1	-7.02138	0.0119513	Os.2694.1.S1_at	caleosin related protein
NM_001064756	-6.96795	0.00514774	OsAffx.28094.1.S1_at	---
9631.m01855	-6.91304	0.00682921	OsAffx.3271.1.S1_at	---
CT836286(10)	-6.82673	0.0024566	OsAffx.5108.1.S1_s_at	---
NM_193257.1	-6.58491	0.00990066	OsAffx.733.1.S1_at	---
LOC_Os01g38130.1	-6.57895	0.000604804	OsAffx.11370.1.S1_at	---
LOC_Os08g32830.1	-6.44444	0.00205665	Os.46055.2.S1_x_at	transposon protein
BM420188	-6.43911	0.00390135	Os.37951.1.S1_at	---
NM_001049002	-6.27451	0.00654936	Os.7995.1.S1_x_at	---
LOC_Os06g38990.1	-6.24	0.00336528	Os.51310.2.A1_at	receptor-like protein kinase 2 precursor
LOC_Os07g10340.1	-6.21111	0.00283423	OsAffx.28384.1.S1_at	---
LOC_Os06g29000.1	-6.15263	0.0143162	OsAffx.31892.2.S1_at	retrotransposon protein
LOC_Os02g37094.1	-6.05575	0.0239378	Os.53505.1.S1_at	---
NM_001052567	-5.97143	0.0023581	Os.50493.1.S1_at	---
LOC_Os04g17090.1	-5.70813	0.00343123	OsAffx.13843.1.S1_at	retrotransposon protein
LOC_Os06g35290.1	-5.58716	0.00662981	OsAffx.15756.1.S1_at	---
9638.m01030	-5.57353	0.00356158	OsAffx.8393.1.S1_at	---
LOC_Os06g19740.1	-5.40741	0.00918834	OsAffx.27718.1.S1_at	---
LOC_Os08g43200.1	-5.39726	0.0082775	OsAffx.6121.1.S1_at	dehydration-responsive element-binding protein 1B, putative, expressed
LOC_Os01g49370.1	-5.38122	0.00744344	OsAffx.24369.13.S1_s_at	BGIOSSFCE002965.1
LOC_Os02g41954.1	-5.34479	0.0168587	Os.30608.3.S1_x_at	gibberellin 2-beta-dioxygenase 7, putative, expressed
LOC_Os01g57990.1	-5.21951	0.0144079	OsAffx.11641.1.S1_s_at	---
LOC_Os04g36030.1	-5.12727	0.00399461	OsAffx.14169.1.S1_at	AIG1
NM_001052163	-5.0745	0.00430171	Os.55303.1.S1_at	---
LOC_Os01g49370.1	-5.07442	0.00431506	Os.7650.1.S1_at	transcription initiation factor IIF, alpha subunit, putative, expressed
LOC_Os07g05940.1	-5.03279	0.00371937	Os.32357.1.S1_at	viviparous-14, putative, expressed
LOC_Os07g05940.1	-5.0297	0.0168841	Os.50053.1.A1_at	---
LOC_Os08g06720	-4.92308	0.00939981	Os.31718.1.S1_at	---
AK102049	-4.82386	0.00991221	OsAffx.28049.1.S1_at	---
AK072920	-4.71333	0.00736243	Os.46478.1.S1_at	---
LOC_Os03g64380.1	-4.68649	0.00271708	Os.49921.1.S1_at	---
LOC_Os01g14290.1	-4.67284	0.00612532	OsAffx.22940.5.S1_x_at	transposon protein
AY286474	-4.53571	0.00485932	Os.28441.1.S1_at	---
LOC_Os07g19160.1	-4.40092	0.00779489	OsAffx.16334.1.S1_at	Cytochrome P450
LOC_Os01g42270.1	-4.37821	0.0404332	OsAffx.11436.2.S1_at	transcriptional corepressor LEUNIG, putative
LOC_Os07g02690.1	-4.33876	0.0474221	Os.23172.1.S1_x_at	DUF538 domain containing protein, putative, expressed
BQ906320	-4.30275	0.00867858	Os.20665.1.S1_at	---
LOC_Os03g15640.1	-4.16883	0.00159855	OsAffx.12876.1.S1_at	---
LOC_Os06g30680.1	-4.14205	0.00722748	OsAffx.4977.1.S1_at	WD domain, G-beta repeat domain containing protein
LOC_Os12g09790.1	-4.12177	0.00229979	OsAffx.31668.1.S1_at	cytochrome P450 76B1
LOC_Os08g38050	-3.93056	0.00953113	OsAffx.25258.1.S1_at	transposon protein
LOC_Os01g36790.1	-3.93053	0.00411865	Os.24917.1.S1_at	DUF26 kinases have homology to DUF26 containing loci
NM_001066839	-3.89655	0.0042346	Os.22837.1.A1_at	---
NM_001069595	-3.80851	0.00124737	Os.17577.1.S1_x_at	---
NM_001066375	-3.78261	0.049704	Os.50436.1.S1_x_at	---
NM_188381.1	-3.75926	0.0184524	OsAffx.22121.1.S1_at	---
9631.m01055	-3.71746	0.00260143	OsAffx.3200.1.A1_at	BGIOSSBCE009368.1
NM_001066109	-3.69799	0.000868602	Os.33007.3.S1_at	---
LOC_Os02g49260.1	-3.65848	0.0435551	OsAffx.24797.1.S1_at	transporter-related, putative, expressed
NM_001053515	-3.58065	0.00826936	Os.54901.1.S1_at	---
AK102449	-3.56688	0.000448404	Os.26716.1.S1_at	---
NM_188879.1	-3.55238	0.00941538	OsAffx.22020.1.S1_at	---
LOC_Os09g11390.1	-3.49275	0.0475124	OsAffx.17644.1.S1_at	transposon protein
LOC_Os05g39850	-3.36719	0.0473582	Os.23359.1.S1_at	DNA replication licensing factor MCM3, putative, expressed
LOC_Os06g47050.1	-3.29213	0.011326	OsAffx.28143.1.S1_at	---
LOC_Os11g03190.1	-3.21922	0.0219843	OsAffx.31557.1.S1_at	---
LOC_Os03g52370.2	-3.10312	0.0279211	Os.16532.1.S1_at	PIII4 - Proteinase inhibitor II family protein precursor, expressed
LOC_Os12g05940.1	-3.01541	0.00390873	OsAffx.31603.1.S1_at	transposon protein
LOC_Os06g18770.1	-2.96648	0.0137008	OsAffx.18229.1.S1_x_at	retrotransposon protein
LOC_Os12g32610.1	-2.96267	0.0248078	OsAffx.31986.1.S1_at	---
LOC_Os07g32550.1	-2.91444	0.00995907	Os.57120.1.S1_at	dimethyladenosine transferase, putative, expressed
CT831661	-2.90756	0.00116445	Os.38806.1.A1_x_at	---
AK100807	-2.86567	0.000126514	Os.46451.2.S1_x_at	---
AK100248	-2.77128	0.0305935	Os.53817.1.S1_at	---
AK100807	-2.76533	0.0424388	Os.46451.1.S1_at	---
LOC_Os01g74152.1	-2.71938	0.00419303	Os.6435.1.S1_at	catalytic/ hydrolase, putative, expressed
LOC_Os05g14740.1	-2.69757	0.0285666	Os.49700.1.S1_at	---
LOC_Os04g34700.1	-2.68421	0.00918374	OsAffx.3996.1.S1_at	---
LOC_Os06g04870.1	-2.65919	0.0348429	Os.2365.1.S1_at	homeobox-leucine zipper protein HAT1, putative
LOC_Os05g13670.1	-2.65306	0.00773414	OsAffx.26868.1.S1_at	---
NM_001057460	-2.62806	0.0312215	Os.2858.1.S1_at	---
AY187941	-2.6239	0.0487848	Os.47761.1.S1_at	---
LOC_Os06g29350.1	-2.61983	0.00168345	Os.50543.1.S1_x_at	myosin, putative, expressed
LOC_Os11g26230.1	-2.60395	0.00241175	OsAffx.27810.1.S1_x_at	transposon protein
LOC_Os06g43210.1	-2.6008	0.0244882	Os.54197.1.S1_at	zinc finger, C3HC4 type domain containing protein, expressed
LOC_Os12g09470.1	-2.58113	0.00973548	OsAffx.19577.1.A1_at	---
LOC_Os04g30420.1	-2.56346	0.0187495	Os.51439.1.S1_x_at	dehydrogenase, putative, expressed
NM_001068543	-2.56164	0.00557995	OsAffx.29558.1.S1_x_at	---
LOC_Os12g32790.1	-2.56071	0.0497925	OsAffx.7771.1.S1_x_at	disease resistance RPP13-like protein 1, putative, expressed
LOC_Os06g49750.1	-2.5533	0.00761609	OsAffx.28193.1.A1_at	kelch motif family protein, expressed
LOC_Os06g02440.1	-2.50593	0.0336538	Os.39933.1.S1_at	---
AK103318	-2.47917	0.00531172	Os.54319.1.S1_at	---
NM_001065339	-2.43599	0.0349366	Os.17585.1.S1_at	---
LOC_Os02g06380	-2.43567	0.0177791	OsAffx.24129.1.S1_at	cdc2-like
LOC_Os03g18790.1	-2.42823	0.00515515	Os.51938.1.S1_at	SAG20, putative, expressed
LOC_Os07g01810.1	-2.3653	0.0117702	Os.29959.1.S1_at	potassium channel protein, putative, expressed
AK109292	-2.30683	0.0191166	Os.56122.1.S1_at	---
NM_001054133	-2.30421	0.0485131	Os.53486.1.S1_at	---
CA761579,CR291925	-2.29855	0.0185507	Os.24291.1.A1_at	---
AK242598	-2.26964	0.0381069	Os.23136.1.A1_s_at	---
LOC_Os03g47270.1	-2.25119	0.0356482	Os.55444.1.S1_at	GCRP4 - Glycine and cysteine rich family protein precursor, expressed
AB190817	-2.22986	0.0439756	Os.12032.1.S1_at	---
LOC_Os06g17410.1	-2.22832	0.0454085	OsAffx.15472.1.S1_at	dof1, putative, expressed
LOC_Os05g34980.1	-2.21749	0.00289811	Os.11846.1.S1_at	amino acid transporter, putative, expressed
LOC_Os01g59120.1	-2.08395	0.0498065	Os.11347.1.S1_at	cyclin IaZm, putative, expressed
LOC_Os03g40090.1	-2.04631	0.00773458	OsAffx.22693.1.S1_x_at	---
AK099529	-2.04495	0.0363944	Os.6671.1.S1_a_at	---
LOC_Os04g52090.1	-2.04148	0.013166	OsAffx.14373.1.S1_s_at	ethylene-responsive transcription factor 4, putative, expressed
LOC_Os04g43440.1	-2.01169	0.00694306	OsAffx.26443.1.S1_s_at	NB-ARC domain containing protein, expressed
LOC_Os12g42160.1	-1.97043	0.045136	Os.47736.1.S1_at	ATP binding protein
NM_001049258	-1.95243	0.0318373	Os.23629.1.S1_at	---
LOC_Os07g48460.1	-1.95029	0.0342751	Os.27926.1.A1_s_at	---
LOC_Os07g42626.1	-1.94438	0.0339018	Os.42801.1.S1_at	STRUBBELIG-RECEPTOR FAMILY 6 precursor, putative, expressed
AK110032	-1.91877	0.0493866	Os.56450.1.S1_at	---
LOC_Os04g30420.1	-1.89283	0.0484309	Os.51439.1.S1_at	dehydrogenase, putative, expressed
LOC_Os10g14920.1	-1.8924	0.0488692	Os.18714.1.S1_a_at	integral membrane protein DUF6 containing protein, expressed
CT829941	-1.88567	0.00957595	OsAffx.3952.1.S1_s_at	---
AK102385	-1.87512	0.0379027	Os.54180.1.S1_at	---
LOC_Os10g40640.1	-1.87174	0.0153228	Os.46627.1.S1_at	glycosyl transferase 8 domain containing protein, putative, expressed
LOC_Os04g44670.1	-1.86226	0.0136531	Os.6539.1.S1_at	AP2 domain containing protein, expressed
LOC_Os07g39880.1	-1.86024	0.0242597	OsAffx.28830.1.S1_x_at	exodeoxyribonuclease V, putative, expressed
AK121046	-1.85964	0.0381867	Os.50398.1.S1_at	---
LOC_Os04g34270.1	-1.83965	0.0438186	Os.49208.1.S1_at	serine/threonine-protein kinase receptor precursor, putative, expressed
NM_001070876	-1.83751	9.51538e-05	OsAffx.30437.1.S1_x_at	---
LOC_Os10g14020.1	-1.83377	0.0251177	Os.4882.1.S1_at	TPD1, putative, expressed]:
AK069815	-1.80562	0.0287967	Os.12186.2.S1_at	---
AK119928	-1.80556	0.0300991	Os.45994.1.S1_at	---
LOC_Os10g11480.1	-1.76648	0.0134078	OsAffx.20646.1.S1_at	retrotransposon, putative, centromere-specific
AK109623	-1.75489	0.0242687	Os.56213.1.S1_at	---
LOC_Os08g33740.1	-1.7504	0.0167778	Os.24363.1.A1_at	CSLA11 - cellulose synthase-like family A, expressed
LOC_Os06g38550.1	-1.74929	0.0367263	Os.19238.1.S1_a_at	---
LOC_Os08g02500.1	-1.73621	0.0397929	OsAffx.16792.1.S1_at	ACR8, putative
NM_001063549	-1.72917	0.0437801	Os.273.1.S1_at	---
LOC_Os03g03370.1	-1.7287	0.00836937	OsAffx.24953.1.S1_s_at	fatty acid hydroxylase, putative, expressed
NM_001053763	-1.72674	0.0271199	Os.9492.1.S1_a_at	---
LOC_Os10g39090.1	-1.7113	0.0494966	Os.55991.1.S1_at	hydrolase, alpha/beta fold family protein, putative, expressed
LOC_Os04g37740.1	-1.6939	0.00669789	Os.49513.1.S1_at	zinc finger, C3HC4 type domain containing protein, expressed
LOC_Os07g04180.1	-1.66515	0.0116876	Os.21238.1.S1_at	amino acid transporter, putative, expressed
AK288002	-1.66036	0.0378204	OsAffx.13282.1.S1_s_at	---
LOC_Os05g15820.1	-1.65173	0.0277337	Os.38764.1.S1_x_at	retrotransposon protein
AK067339	-1.64852	0.037223	Os.406.1.S1_a_at	---
XM_354044.1	-1.62252	0.0491521	OsAffx.21003.1.S1_at	---
LOC_Os03g50120.1	-1.61415	0.0373299	Os.27979.1.S1_at	---
LOC_Os03g07190.1	-1.60714	0.0331961	Os.28404.1.A1_at	---
LOC_Os11g37980.1	-1.60472	0.0230206	Os.57033.1.S1_at	GAUT2/LGT2, putative, expressed]:
LOC_Os01g11414.1	-1.60352	0.0407277	Os.3917.1.S1_s_at	sodium/calcium exchanger protein, putative, expressed
LOC_Os01g18080.1	-1.60124	0.0409735	Os.6672.1.S1_at	retrotransposon protein
LOC_Os05g51520.1	-1.58772	0.0468501	Os.27568.1.S1_at	transposon protein, putative
CT835893	-1.5868	0.0104114	Os.47019.1.S1_at	---
LOC_Os11g10420.1	-1.58465	0.01126	OsAffx.7064.1.S1_at	1-phosphatidylinositol 4-kinase, putative, expressed
AK105509 ,CT829018	-1.57847	0.0151475	OsAffx.11050.2.S1_x_at	---
LOC_Os01g58310.1	-1.56613	0.038211	Os.28798.1.S1_at	---
LOC_Os03g20440.1	-1.56531	0.0236863	Os.18622.1.S1_at	VQ motif family protein, expressed
LOC_Os12g05040.1	-1.56443	0.0472212	Os.7649.1.S1_at	heavy-metal-associated domain-containing protein, putative, expressed
LOC_Os12g43660.1	-1.55798	0.00122842	Os.53319.1.S1_at	receptor-like protein kinase HAIKU2 precursor, putative, expressed
AB028129	-1.55418	0.0274503	Os.4182.2.S1_x_at	---
LOC_Os07g18250.1	-1.55195	0.0201379	Os.52547.1.S1_at	---
LOC_Os04g28470.1	-1.54726	0.000189132	Os.40031.4.S1_at	retrotransposon protein
LOC_Os10g32930.1	-1.54681	0.0264171	Os.46842.1.S1_at	---
EU220429	-1.54428	0.0322259	Os.12277.1.S1_at	---
LOC_Os02g30840.1	-1.53973	0.00416733	Os.53662.1.S1_at	RNA pseudouridine synthase, putative, expressed
AK072634	-1.53913	0.035911	Os.51804.1.S1_at	---
LOC_Os12g16480.1	-1.53857	0.00133	OsAffx.7611.1.S1_at	conserved hypothetical protein
LOC_Os03g25930.1	-1.53613	0.00929039	Os.50934.1.S1_at	emp24/gp25L/p24 family protein, putative, expressed
LOC_Os05g48690.2	-1.52767	0.00335442	Os.35356.1.S1_at	transcription factor like protein, putative, expressed
LOC_Os03g58230.1	-1.52611	0.00436129	Os.10490.1.S1_at	plant-specific domain TIGR01615 family protein, expressed
LOC_Os01g56290.1	-1.52309	0.0301279	OsAffx.23808.2.S1_x_at	---
LOC_Os06g08110.1	-1.5225	0.00905849	Os.53987.1.S1_at	nodulin, putative, expressed]:
NM_001066536	-1.52177	0.0168411	Os.5606.1.S1_at	---
LOC_Os04g45280.2	-1.51344	0.0259532	Os.47891.1.S1_at	histidine triad family protein, putative, expressed
LOC_Os08g31580.1	-1.51223	0.0471556	Os.5599.1.S1_at	DRE binding factor 1, putative, expressed
LOC_Os01g65410.1	-1.50793	0.0441078	Os.5420.1.S1_at	serine hydroxymethyltransferase, mitochondrial precursor, putative,
LOC_Os09g39700.1	-1.50581	0.00044896	Os.54357.1.S1_at	nucleic acid binding protein, putative, expressed
LOC_Os08g27040.2	-1.50495	0.0350848	Os.51117.1.S1_at	lipid phosphatase protein, putative, expressed]:
LOC_Os03g55870.1	-1.50376	0.00307059	Os.17653.1.S1_at	membrane associated DUF588 domain containing protein, putative, expressed
LOC_Os11g45030.1	1.49633	0.0125185	OsAffx.24840.1.S1_at	---
LOC_Os04g28480.2	1.51121	0.0354198	OsAffx.26210.1.S1_at	retrotransposon protein, putative,
LOC_Os01g74370.1	1.51471	0.00371476	Os.32602.2.S1_x_at	BGIOSGA030308
LOC_Os11g17530.2	1.51535	0.000463696	Os.6596.1.S1_at	pentatricopeptide, putative, expressed
LOC_Os10g40990.1	1.52312	0.0067877	Os.52326.1.S1_at	flavonol synthase
LOC_Os10g33730.1	1.52333	0.0401886	Os.46535.2.S1_x_at	pentatricopeptide, putative, expressed
LOC_Os03g58690.1	1.52391	0.0453223	Os.18604.1.S1_at	---
LOC_Os03g31750.2	1.52728	0.0112996	Os.12528.1.S1_x_at	pyruvate, phosphate dikinase, chloroplast precursor, putative, expressed
NM_001053066	1.52807	0.0288638	Os.17869.1.S1_at	---
LOC_Os05g46030	1.52886	0.00382168	OsAffx.27335.1.S1_x_at	myosin head family protein, expressed
CB619409	1.53387	0.0159373	Os.19424.1.A1_at	---
AK064431	1.53403	0.0397107	Os.51969.1.S1_at	---
NM_001058661	1.54828	0.0376956	Os.55716.1.S1_at	---
LOC_Os02g03640.1	1.55347	0.012957	Os.44418.2.S1_at	---
LOC_Os10g40720	1.55459	0.0370955	Os.6786.1.S1_a_at	expansin precursor, putative, expressed
LOC_Os02g17330.1	1.55519	0.04083	Os.46554.1.S1_at	4-amino-4-deoxychorismate lyase, putative, expressed
LOC_Os12g13290.1	1.56005	0.0139964	Os.17844.1.S1_x_at	---
AK287880	1.56681	0.042069	Os.27118.1.A1_at	---
NM_001064583	1.57315	0.0394836	Os.9761.1.S1_at	---
LOC_Os02g06170.1	1.5868	0.0114259	Os.38286.1.S1_at	---
LOC_Os07g31720.1	1.58999	0.0118076	Os.9787.1.S1_at	ZAC, putative, expressed
CB630286	1.593	0.0210131	Os.26961.1.A1_at	---
LOC_Os07g38070.1	1.59725	0.0477642	Os.27184.1.S1_at	protein kinase, putative, expressed
AK106920	1.59902	0.0138376	Os.20309.1.S1_at	---
LOC_Os08g39740.1	1.59968	0.0452446	OsAffx.6086.1.S1_at	---
LOC_Os04g45940.1	1.61299	0.00227486	OsAffx.4103.1.S1_s_at	---
LOC_Os05g49910.1	1.63874	0.0489243	Os.57367.1.S1_at	---
LOC_Os11g07670.1	1.63891	0.0443828	Os.9178.1.S1_at	dirigent, putative, expressed
LOC_Os01g42800.1	1.6448	0.0352321	OsAffx.21361.1.S1_at	---
AK071876	1.64906	0.00242569	Os.49133.1.S1_at	---
LOC_Os04g47200.1	1.67258	0.0455823	OsAffx.26498.1.S1_at	---
LOC_Os03g61040.1	1.67821	0.041895	Os.36472.1.S1_x_at	---
LOC_Os02g56140.1	1.68517	0.0145269	OsAffx.3088.1.S1_at	protein SPATULA, putative, expressed
LOC_Os04g34290.1	1.68603	0.0341501	OsAffx.26321.1.S1_at	protein kinase, putative, expressed
AK107998	1.71151	0.00733481	Os.55393.2.S1_at	---
LOC_Os08g20544.1	1.72072	0.00254439	Os.16867.1.S1_at	calcium lipid binding protein-like, putative, expressed
LOC_Os06g33980.1	1.7274	0.0360082	Os.24713.2.S1_x_at	tRNA-splicing endonuclease subunit Sen2, putative, expressed
LOC_Os07g03830.1	1.73588	0.0378939	Os.44541.1.S1_at	lectin-like receptor kinase, putative]:
LOC_Os01g69830.1	1.77171	0.0117146	OsAffx.2442.1.S1_x_at	teosinte glume architecture 1, putative, expressed
LOC_Os12g21940.1	1.79743	0.0419688	Os.54717.1.S1_at	---
LOC_Os01g50450.1	1.80338	0.00434366	Os.11717.2.S1_at	---
NM_001063310	1.81262	0.0105797	OsAffx.15270.1.S1_at	---
NM_001048795	1.82034	0.0268149	Os.9853.4.S1_x_at	---
LOC_Os02g58220.1	1.83737	0.0823811	Os.7052.1.S1_at	replication protein A 32 kDa subunit, putative, expressed
LOC_Os10g26670.1	1.85864	0.00380061	OsAffx.30548.1.S1_at	---
LOC_Os05g24500.1	1.87651	0.0288444	OsAffx.14806.1.S1_at	terpene synthase, N-terminal domain containing protein, expressed
LOC_Os07g29770.2	1.8913	0.0427188	Os.36953.2.S1_x_at	zinc finger protein, putative, expressed
LOC_Os01g14530.1	1.94475	0.0156932	Os.30173.1.S1_at	AWPM-19-like membrane family protein, putative, expressed
LOC_Os01g14270.1	1.9472	0.0370319	OsAffx.22046.2.S1_at	F-box domain containing protein
LOC_Os07g30330.1	1.9478	0.0114042	Os.51026.1.S1_x_at	cytokinin-O-glucosyltransferase 2, putative, expressed
LOC_Os04g33940.1	1.99331	0.0300033	Os.52509.1.S1_at	protein of unknown function DUF1279 domain containing protein, expressed
LOC_Os01g36294.1	2.05172	0.01418	Os.38346.1.S1_x_at	cytochrome P450 71C4, putative, expressed
LOC_Os07g30620.1	2.05237	0.0139229	Os.51026.1.S1_at	cytokinin-O-glucosyltransferase 2, putative, expressed
Os10g0394150	2.17549	0.00525626	OsAffx.20384.1.S1_at	---
BGIOSSFCE035347.1	2.20028	0.003909	OsAffx.7852.1.S1_at	---
LOC_Os07g47460.1	2.21748	0.0118126	Os.9719.1.S1_at	---
AY220642	2.23121	0.00693897	Os.50727.1.S1_x_at	---
LOC_Os04g38230.1	2.45255	0.00207929	OsAffx.26371.1.S1_at	---
LOC_Os08g43260.1	2.8	0.00259526	OsAffx.17493.1.S1_at	---
LOC_Os06g27820.1	2.82609	0.00710067	OsAffx.27839.1.S1_at	---
LOC_Os03g10840.1	2.98556	0.00105852	OsAffx.22433.5.S1_at	---
LOC_Os04g27060.1	3.11634	0.000247766	Os.11266.1.S1_at	auxin-induced protein PCNT115, putative, expressed
LOC_Os02g05520.1	3.12162	0.000618074	Os.50891.1.S1_at	---
LOC_Os06g51240.2	3.22603	0.00823113	Os.23648.1.S2_at	---
BGIOSSBCE006267.1	3.3738	0.00625989	OsAffx.24403.1.S1_at	---
LOC_Os11g43850.1	3.49206	0.00499562	OsAffx.7400.1.S1_at	pectinesterase, putative
LOC_Os01g22560.1	3.85876	0.0069809	Os.11128.1.S1_at	glycerol-3-phosphate acyltransferase 1, putative, expressed
LOC_Os05g29800.1	3.95349	0.00463598	OsAffx.27076.1.S1_at	---
AK110227	3.98592	0.00923757	Os.56631.1.S1_at	---
LOC_Os02g42110.1	4.09091	0.00881212	OsAffx.12449.1.S1_at	wall-associated receptor kinase-like 22 precursor, putative
LOC_Os08g05720.1	4.17188	0.00209005	OsAffx.29052.1.A1_at	---
LOC_Os12g13140.1	4.30769	0.00852193	OsAffx.19640.1.S1_at	---
LOC_Os01g21020.1	4.32812	0.00916825	OsAffx.11136.1.S1_at	---
LOC_Os09g34890.1	4.42755	0.0273809	Os.55378.1.S1_at	---
NM_188224.1	4.6	0.00776061	OsAffx.1302.1.S1_at	---
LOC_Os09g36010.1	4.74074	0.00725187	OsAffx.30146.2.S1_x_at	---
LOC_Os01g26980.1	4.77333	0.00437983	OsAffx.17848.4.S1_x_at	transposon protein, putative, unclassified
LOC_Os01g41540.1	4.81553	0.00172226	OsAffx.2206.1.S1_at	---
LOC_Os05g13420.1	4.82444	0.00438833	Os.30055.1.S1_x_at	glycoprotein X precursor, putative, expressed
LOC_Os02g36924.1	4.88679	0.00730105	Os.49762.2.S1_a_at	MADS-box transcription factor 27, putative, expressed
AK060368	5.016	0.00531603	Os.51051.1.S1_at	---
LOC_Os04g44890.1	5.10317	0.00498469	OsAffx.4093.1.S1_at	tRNA-dihydrouridine synthase 2-like, putative,
XM_353881.1	5.29412	0.00269238	OsAffx.8812.1.S1_at	---
LOC_Os06g39030.1	5.33151	0.0026223	OsAffx.28000.1.A1_at	---
LOC_Os07g46060.1	5.55224	0.00594134	OsAffx.30966.4.S1_at	---
LOC_Os12g15314.1	5.7	0.00938725	Os.52637.1.S1_x_at	nuclease, putative, expressed
LOC_Os12g30000.1	5.81944	0.00304061	OsAffx.31937.1.S1_at	---
LOC_Os05g31470.1	5.88235	0.00138261	OsAffx.14900.1.S1_at	---
BGIOSSBCE008122.1	5.91026	0.00251356	OsAffx.3054.1.S1_at	---
LOC_Os01g16320.1	5.92199	0.00958003	OsAffx.22199.2.S1_x_at	plant-specific domain TIGR01570 family protein
LOC_Os07g25940.1	6.04878	0.00986279	OsAffx.28591.1.S1_at	---
LOC_Os02g13480.1	6.49153	0.00752394	OsAffx.12251.2.A1_at	---
LOC_Os03g22680.2	6.65854	0.00198108	Os.53636.1.S1_at	---
BGIOSSBCE024018.1	6.7907	0.00323299	OsAffx.1228.1.S1_at	---
LOC_Os09g22410.2	7.18782	0.00948818	OsAffx.6365.1.S1_at	pyruvate kinase-like, putative, expressed
LOC_Os09g04720.1	7.36	0.0039302	OsAffx.17570.1.S1_at	SWIb domain-containing protein, putative, expressed
LOC_Os12g13630.1	7.55556	0.0033717	OsAffx.19653.1.S1_at	---
LOC_Os09g17930.1	7.56348	0.0115779	Os.7775.1.S1_at	transposon protein, putative, unclassified, expressed
LOC_Os12g31430.1	7.72398	0.00297005	OsAffx.19913.1.S1_at	---
LOC_Os03g02290.1	7.77108	0.00171567	OsAffx.12711.1.S1_x_at	ATP binding protein, putative, expressed
LOC_Os12g44080.1	8.03306	0.000474323	OsAffx.32183.1.S1_s_at	p8MTCP1, putative, expressed
LOC_Os04g50710.1	8.21875	0.00346955	OsAffx.4138.1.S1_at	pathogenesis-related 10 protein PR10-1, putative
LOC_Os01g11740.1	8.31618	0.00607327	Os.31301.1.S1_at	esterase precursor, putative, expressed
LOC_Os12g01980.1	8.35032	0.00297929	OsAffx.31547.1.S1_at	---
NM_193299.1	8.45588	0.00918125	OsAffx.22299.2.A1_at	---
LOC_Os09g27740.1	8.45683	0.00778977	OsAffx.6419.1.S1_at	Os09g0450801
LOC_Os04g21160.1	8.46939	0.000964811	OsAffx.13903.1.S1_at	gastric triacylglycerol lipase precursor
BI800187	8.64062	0.00629394	Os.14034.1.S1_at	---
CA762298,CR282369	8.81636	0.0409909	Os.24648.1.A1_at	---
NM_194040.1	8.99435	0.000972385	OsAffx.21090.1.S1_at	---
LOC_Os09g29420.1	9.07588	0.00743563	Os.32882.1.A1_a_at	queuine tRNA-ribosyltransferase, putative, expressed
LOC_Os02g47744.1	9.23596	0.00706031	OsAffx.24769.1.S1_at	---
LOC_Os02g17860.1	9.46875	0.0016905	OsAffx.2658.1.S1_x_at	---
LOC_Os01g41510.1	9.58824	0.00187295	Os.23476.1.A1_at	calcineurin B-like protein 4, putative, expressed
LOC_Os05g29770.1	9.625	0.00291548	OsAffx.14875.1.S1_at	---
LOC_Os12g29714.1	9.73846	0.00217116	OsAffx.30032.4.A1_at	---
LOC_Os02g20460.1	10.2796	0.00392663	OsAffx.12133.1.S1_at	---
LOC_Os03g62290.1	10.637	0.0046881	Os.57380.1.S1_at	---
LOC_Os03g43684.1	11.8769	0.00643129	OsAffx.25521.1.S1_at	---
LOC_Os01g65340.1	12.4082	0.00135216	OsAffx.9633.1.S1_at	---
LOC_Os06g37210.1	13	0.00898691	OsAffx.15791.1.S1_at	---
LOC_Os04g28074.1	13.5882	0.0085866	OsAffx.26194.1.S1_at	---
LOC_Os12g09390.1	13.9211	0.000274831	OsAffx.31661.1.S1_at	---
LOC_Os08g01980.1	16.0155	0.00644825	OsAffx.16783.2.S1_at	---
LOC_Os05g02600.1	17.7021	0.00118819	OsAffx.14506.1.S1_at	---
BGIOSSBCE009542.1	19.7321	0.00373579	OsAffx.9572.1.S1_at	---
LOC_Os08g28480.1	19.95	0.00350754	OsAffx.17211.1.S1_at	---
NM_001058064	23.72	0.000197295	Os.52448.1.S1_at	---
LOC_Os11g10640.1	28.9497	0.00180248	OsAffx.18786.1.S1_at	protein kinase domain containing protein, expressed
Os01g0103500	29.1996	0.0017154	Os.56066.1.S1_at	---
*Fold change(sd37/3037):Fold change between sd37 and WT apices (1.5-fold cutoff).
P-value represents the Change P value.
